# Supplementary material for: Effect of electronic adherence monitoring on adherence and outcomes in chronic conditions: A systematic review and meta-analysis
Source: PLoS One. 2022 Mar 21;17(3):e0265715. doi: 10.1371/journal.pone.0265715 (PMC8936478; doi:10.1371/journal.pone.0265715)
Supplement: S1 Data — (XLSX) [file pone.0265715.s007.xlsx]

## Sheet: Sheet1
Author	Year	Setting	County	Sub cass of setting	Condition	No. of participants	Subjects	Age	Length of study	Completion rate	Inclusion	Exclusion	Type of EMD	Subclass of EMD	Adherence measurements	Intervention type (direct, indirect, both)	Real time feedback	BCTs	Intervention	Control	Outcome measures	Blinded to adherence monitoring function?	Effect on adherence	Adherence findings	Clinical effect	Other findings	Qualitative feedback on device
Andrade et al.	2005	The Johns Hopkins Moore HIV Clinic, Baltimore, MD	USA	Specialty Clinic	HIV	64	64 HIV infected males and females ≥18 years attending HIV clinic	Adults	24 weeks	58 / 64	Able to self-medicate, previously treatment naïve and initiating HAART or not treatment naïve (but ≤3 HAART) but switching HAART regimens	Severe dementia, institutionalization	Electronic verbal prompting device - Disease Management Assistance System (DMAS). Device produces a timed, programmed voice message that prompts subjects to take medications. Records dosing times and dates when response button is pressed. Data can be uploaded and printed.	DMAS	Electronic drug-exposure monitoring (eDEM) caps on protease inhibitor or nonnucleoside reverse transcriptase inhibitor. Supplemented by: AIDS Clinical Trial Group ACTG Adherence Questionnaire; DMAS device. Adherence assessed monthly using data from the 4 days prior to the study vist	Both	No	Prompt/cues; behaviour feedback	Same as control plus the DMAS device programmed with reminder messages and dosing times for each medication in the HAART regimen. Adherence results reviewed with participants.	Monthly 30-min adherence counseling session with education about barriers to adherence, hazards of non-adherence and their HAART regimen.	Adherence - monthly; neuropsychological status - BL and wk 24; mood disorder; substance use in 4 days prior to study visit; CD4 count and plasma HIV RNA - BL, wk 12 and 24	Not stated but as adherence from the eDEM was reviewed with all participants - assume no blinding.	15% (nss), subgroup in memory-impaired subjects 20% (ss)	Overall adherence did not differ significantly between groups (80% int vs 65% cont); however posthoc analyses showed that those with impaired memory had significantly improved adherence (77% vs 57%) with the intervention (P = 0.001). Subjects with intact memory did not show difference with the intervention (83% vs 77%, P=0.25). Final ITT = 29 in each arm.	Greater reduction in viral load, no difference in CD4	The intervention group had a greater reduction in plasma HIV RNA loads at week 24 than the control. There were no differences in CD4 counts.	Not conducted
Artinian et al.	2003	CHF clinic of the Detroit Veterans Affairs Medical Center	USA	Specialty Clinic	CHF		18 outpatients from the CHF clinic aged 50 to 87 years	Older age	3 months	18/18 (drop outs not discussed so assume 100% completion)	Age ≥18 years, symptomatic left ventricular dysfunction, ejection fraction of ≤40%, access to a telephone at place of residence, ability to read and understand English, remaining in the city during study period.	History of dementia, mental illness, symptomatic infectious disease or advanced liver disease, self reported substance abuse, haemodialysis, coronary angioplasty within last 60 days or CABG surgery within last 90 days, inability to participate in a 6-minute walk test; terminal stages of cancer	Medication compliance device - Med-eMonitor linked to a Web-based monitoring system via the patient's telephone line. Stores up to 5 medications and has an alarm to remind patients to when to take their medications, which to take, and how many. Daily reminders given about about healthy lifestyle, othermedications and questions about symptoms, BP, weight. Records date and time stamp of pill compar…	Med-eMonitor	Pill counts (both groups) and compliance device (intervention group)	Direct	No	Education, prompts/cues	Same as control plus a Med-eMonitor	Educational booklet on CHF self-care behaviours, cardiologist follow-up as per usual care, education from pharmacist about medication-taking and provision of written medication information	Adherence, self care, QOL, functional status - all BL and 3 months	Not stated	Not compared	Insufficent data available for comparison of adherence; monitor group had 94% adherence.	No effect on clinical but had better physical QOL	The intervention did not improve any clinical parameters - there was no significant difference in self care, quality of life, functional status or compliance with weight or blood pressure monitoring though there were trends towards better compliance with weight / BP monitoring but this was not signficiant. Subgroup analyses showed the intervention group had better physical QOL but not difference …	Patients loved it (56%) - found they enjoyed the reminders and were better able to stay on schedule with their medication doses; hated it (44%) as felt tehri life was regulated by the monitor and found it was a nuisance; some had technical difficulties (44%) with difficulties getting out the pills from the device or reading the screen; some felt it changed their lifestyle (67%) as it helped them …
						18
Burgess et al.	2010	Pediatric asthma clinic within an outer metropolitan general hospital, Australia	Australia	Specialty Clinic	Asthma	26	26 children aged between 6-14 years	Children	4 months	26/26	Asthma not well controlled despite preventive medication based on asthma symptoms and / or lung function.	Not listed	Smartinhaler - validated electronic monitoring device	Smartinhaler	Smartinhaler EMD	Indirect	No	Behavioural feedback	Same as control but had the measured adherence with preventive medication was fed back to the child, parent and physician then incorporated into the management plan for the next month.	Personalized asthma education and management plan, plus generic written information. Devices replaced monthly but adherence data not shared.	Adherence; symptom questionnaire; lung function testing - all assessed monthly for 4 months	No - aware device would count number of doses	21% (ss)	Adherence was significantly higher in the group receiving adherence feedback (79.0% vs 57.9%, P<0.01). This adherence was maintained and rose over the final month compared to the control where adherence declined over the study. Data from author: Month 1 Month 2 Month 3 Month 4 SD Feedback 20.26% 19.36% 14.74% 11.49% SD Control 23.79% 26.33% 24.37% 24.32% Overall adherence: Feedback - SD 13.1% and…	Improved asthma control	Significant improvement in asthma control in both groups (use of reliever medication; mean FEV1). The change in FEV1 (% predicted) was greater in the intervention group but as BL values were lower in the intervention group, the improvement was not significant. No difference in number of people with exacerbations.	Not assessed
Chan et al.	2015	Regional hospital emergency department, Auckland, New Zealand	NZ	Hospital	Asthma	220	220 children aged between 6-15 years	Children	6 months	213/220	Attending ED with an asthma exacerbation, and on treatment or needed treatment with a regular twice-daily inhaled corticosteroid	Diagnosis of chronic lung disease other than asthma, congenital heart disease, severe chronic medical condition leading to increased morbidity or impaired immunity, residence outside Auckland area	SmartTrack electronic monitoring device with audiovisual reminder function for use with preventive medication. Records date, time and number of actuations used. Has 14 different reminders that ring twice daily, stopping after the correct dose is taken or after 15 min. Reminder only goes if the correct dose is not taken within 6 hours of the set reminder time.	SmartTrack	SmartTrack EMD	Direct	Yes	Prompts/cues; behavioural feedback	SmartTrack EMD with audiovisual reminder function enabled (twice daily reminders)	SmartTrack EMD with audiovisual reminder function disabled	Adherence, number of days absent from school, reliever use - 6 months data; asthma control, lung function, ED attendance, days off work by caregivers, asthma exacerbations - assessed every 2 months for 6 months.	Yes	54% (ss)	Those receiving the intervention had significantly greater adherence (84% vs 30%). Author info: Intervention 78.5% +/- 18.7, control 35.0 +/- 23.2%, data based on n=109 in each arm (1 missing in each)	Improved asthma control	Significantly greater improvement in asthma control seen with the intervention with a significant reduction in reliever use. A significant difference in exacerbations was seen in the first 2 months between the groups, but this difference was lost by 4 months. No difference in days absent from school, lung function, ED attendance nor days off work by caregivers.	Not assessed
Charles et al.	2007	P3 Research clinical trials facility, Wellington , NZ. Recruitment was from research volunteer databases, newspaper advertisements, informal contacts	NZ	Research centre	Asthma	110	110 patients aged 12 to 65 years	Adults	2 week run-in period, 24 weeks after	90 / 110	Diagnosis of asthma, on a regular inhaled corticosteroid at a fixed dose, no asthma exacerbation in the previous or run-in period, not pregnant or lactating, and on contraception if of child-bearing potential	Diagnosis of chronic obstructive pulmonary disease, use of a long-acting beta agonist, history of other clinically significant disease.	Smartinhaler - electronic monitoring device for use with metered dose inhalers. It has an audiovisual reminder function, that emits an audible reminder (beep) at set times plus a visual cue to show patients whether they have taken their inhaler during a designated period or not (green before inhaler use; red once dose taken). Alarm stops after dose is taken or after 60 min. An electronic covert a…	Smartinhaler	Smartinhaler EMD	Direct	Yes	Prompts/cues; behavioural feedback	Fluticasone propionate 250 micrograms twice daily via the Smartinhaler device with covert adherence monitoring and an audiovisual reminder function (twice daily alarms)	Fluticasone propionate 250 micrograms twice daily via the Smartinhaler device with covert adherence monitoring	Asthma control; Peak expiratory flow; self-assessment of how many doses patients thought they had missed in the last 4 weeks - assessed at 0, 6, 12, 18 and 24 weeks	Yes	22% (ss)	Those receiving the intervention had significantly greater adherence in the last 12 weeks of the trial (88% vs 66%); 95.5% took >50% of their medications in the reminder group vs 71.7% in the control. N=44 (int), N=46 (cont) at study end	No effect on clinical	Those in the control underestimated how many doses they had missed in the final 4 weeks of the study by a significantly greater amount than the reminder group (median difference 8 (95% CI 3-15). Dose dumping occurred more frequently in the con trol group (43 occasions vs 10). No significant differences in clinical outcomes (PEF, asthma control).	Not assessed
Christensen et al.	2010	Included by physicians in private practice or hospital ambulatories across Poland	Poland	Combination	Hypertension	784	784 patients aged ≥18 years	Adults	1 year (6 months with either the device or standard therapy, then crossed over to other arm for 6 months)	398 / 784 in final analysis	Patients aged ≥18 years with a untreated or ineffectively treated arterial hypertension	Cholestatic disorders, severe hepatic failure, allergy to telmisartan (study drug), pregnancy and lactation, unwilling to participate, unable or unwilling to use the device.	Helping Hand Data Capture device. Device has tablet blister cards and has an audiovisual reminder to remind patients once daily to take their medication. It records compliance by recording the date / time of each blister card removal.	Helping Hand	Self report at 6 and 12 months; electronic monitor throughout study	Direct	No	Prompts/cues.	Patients received medical treatment with telmisartan once daily (40 or 80mg) and received electronic compliance monitoring with the audiovisual reminder	Patients received medical treatment with telmisartan once daily (40 or 80mg) without the electronic monitor (standard therapy)	Blood pressure at each of 5 study visits per patient (approx every 3 months for 1 year); self-report of compliance - at 6 and 12 months	Not stated	In the first half of the study, patients using the reminder and monitoring device gave a self-reported compliance of 90.6%, whereas patients in the control group reported 85.1% compliance, a difference of 5.5%. This difference does not reach significance as the standard deviation is very wide. In the second half of the study, after crossover, patients using the device reported 86.3% compliance, w…	Self reported compliance was higher in the intervention group than control (5.5% difference) in the 1st 6 months, but the opposite was seen in the crossover (-2.1%). This was not significant. This seems the device is most effective when used with newly initiated treatment. Patients who used the device from the onset of treatment also had higher adherence (taking, dosing, timing and fewer drug hol…	No effect on clinical	No significant difference in BP between groups at any point in the study.	Not assessed, though a high percentage (50.3%) of patients chose not to use the device and were not included.
de Bruin et al.	2010	HIV outpatient clinic of the Academic Medical Centre (AMC) in Amsterdam, The Netherlands	Amsterdam	Specialty Clinic	HIV	133	133 patients ≥ 18 years	Adults	9 months (2 months baseline measurement, 3 months intervention, 4 months follow-up)	116/133	Treatment experienced (>6 months on HAART), started antiretrovial treatment in 1996 or later, white and Dutch-speaking, no psychiatric disorders, not addicted to hard drugs or alcohol, willing to follow study visit schedule.	Not listed	Medication Event Monitoring System (MEMS) caps - electronic caps that fit on standard pill bottles and register the date / time of each pill bottle opening. Data can be downloaded and printed from the MEMS cap to provide a detailed but comprehensible overview of medication taking behaviour. The MEMS-viewcap used to feedback data to patients as it has a display on top.	MEMS	MEMS cap	Both	Yes	Tailored behavioural feedback; problem solving; discrepancy with target behaviour; self monitoring	Theory- and evidence-based behaviour change intervention - Adherence intervention (AIMS). HIV nurses delivered adherence strategies based on their adherence; those scoring >95% at baseline received "adherence sustaining" intervention; those <95% received "adherence improving" intervention. The "adherence sustaining" involved feedback of MEMS reports, reinforcement, brief discussion of any difficu…	No intervention - only usual care consisting of verbal and written information about treatment and consequences of nonadherence; tailoring of the medication regimen and intake schedule to the patients' daily life; monitoring of side effects; promotion of use of adherence assisting devices; discussion of adherence problems and solutions; feedback about viral load and CD4 count. The MEMS reports we…	Mean 2-month adherence scores at BL (month 1-2), intervention (month 4-5) and follow-up over 2-month periods (month 8-9); viral load (BL, month 5 and month 9)	No	Taking adherence 6.51%, timing 7.4% (ss); subgroup 15.2% in those with <95% BL adherence (ss) .	Adherence improved significantly in the intervention group (taking (mean diff 6.51% (3.35-9.68%) for intensive group only and timing (mean diff 7.4% (3.5 -11.3%)) adherence) for complete group). Subgroup analyses showed this was mainly in those that had <95% baseline adherence (mean diff 15.2% (8.42 - 21.98%)). Those with >95% baseline adherence did not have better medication adherence (remained …	Greater reduction in viral load	Number of patients with an undetectable viral load increased significantly in the intervention vs control group (OR 2.96, P < 0.05); this was mediated by improvements in adherence both in taking and timing adherence.	Some patients refused to be in the study as the MEMS was too big (38/276); were afraid MEMS might disturb routine (17/276). After consideration, more patients felt the MEMS was too big and impractical to use (7/155) so refused to continue. At study end, another 6/133 patients dropped out due to the MEMS being too big or impractical to use. Evaluation by patients (n=50) and HIV nurses (n=7) about …
De Geest et al.	2006	The University Hospital Basel, or Cantonal Hospital, Aarau, Switzerland	Switzerland	Hospital	Renal transplant	18	18 patients ≥18 years	Adults	9 months (3 months intervention, 6 months follow-up)	13/18	Non-adherent to immunosuppressive regimen as identified in a previous study based on 3 months of electronically monitored adherence; followed-up at the University Hospital Basel, or Cantonal Hospital, Aarau, Switzerland; French- or German-speaking; literate; undergone kidney transplant surgery at least 1 year prior to study; able to self-administer immunosuppressive drugs; reside withinh 180km ra…	Lacked mental clarify based on clinician's appraisal, could not read forms or electronic monitoring printouts with at least corrective lens; had no telephone service at home.	Electronic bottle cap that registers data/ time of bottle opening; data downloaded to a computer which generates lists and graphics of medication-taking habits.	MEMS type	Electronic monitoring via a bottle cap - registers data/ time of bottle opening.	Indirect	No	problem solving; behavioural feedback; goal setting	Usual care plus 1 home visit after study inclusion, 3 follow-up phone calls at the end of each month. EM printouts were sent to patients before each phone session to enable discussions. Intervention involved behavioural, educational and social support interventions aimed to increase patient self-efficacy in taking medications consistently. EM printouts used for problem detection, proxy goal setit…	Usual care but physicians were notified if patients were non-adherent; and depression scores suggested moderate/ severe depression or suicidal ideation. Any interventions made by physicians in response to non-adherence were noted.		NO	No numbers; but not statistically different (nss)	Both groups had reductions in the degree of non-adherence over the first 3 months. The intervention group had a greater decrease in non-adherence but this was not statistically significant. After 3 months, non-adherence increased in both groups and reached comparable levels at 6 months. Data only reported as chi-sqiares "Although the IG patients’ chance of being nonadherent during the first three…	Not measured	Nil	Patients in the intervention group felt the EM printouts were the most helpful part of the intervention to allow problem detection, feedback provision and goal setting.
Duncan et al.	2013	Rural, university-based hospital in the northeastern United States and an urban-based children's hopsital in the Midwest.	USA	Hospital	Asthma	55	55 participants aged 9-15 yrs	Children	4 sessions of treatment over 2-months with a 3-month follow-up. Total time was 6 sessions (recruitment; 2,4,6,8 weeks; follow-up) across ~5 months.	48/55	Diagnosis of persistent asthma at least for 6 months; on a fluticasone metered dose inhaler daily; no evidence of neurological or significant cognitive impairment as per parental report	Not listed	MDILog-II electronic recording device - caputes date/ time of inhaler dispensings and whether the participant had inhaled the medication. Attaches to the inhaled corticosteroid canister.	MDILogII	Mean daily adherence from the MDILog-II	Indirect	No		Teamwork intervention. Importance of parents and youth sharing responsibility for asthma management emphasized and learning methods for addressing conflicts. Families trained in a standardized level of parental supervision of medication use. As youth improved with adherence and reaching adherence goals, supervision reduced based on EM adherence information. Asthma Education arm served as an atten…	Standard care; on completion of follow-up, families were provided feedback on child's adherence and offered an opportunity to receive either of the 2 interventions.	Medication adherence monitored throughout treatment nad 1 month before follow-up - data downloaded at five different times for each participant (sessions 2-6); conflict; severity of asthma symptoms; lung function (all done at sessions 1, 5, 6)	Yes - only patients in the intervention group were aware of the monitoring functin; other groups had non-detailed explanations about the device function.	44% (ss)	Teamwork intervention group had significantly higher medication adherence rates - at 20 weeks, mean adherence was 81% vs 33.6% (AE) and 37.0% (Standard) groups. Numbers were mean (SD): Treatment 81.0 (24.9), AE 33.6 (27.4), Control 37.0 (32.3).	Improved asthma control	Teamwork group reported less asthma symptoms than the other groups, and had a trend towards better small airway functioning than than the usual care group but not with the asthma education group. Those in the usual care group had significantly higher parental-rated conflict than the teamwork group; for adolescent-reported conflict, there was no difference between teamwork and other groups but the…	Parental feedback on difficulty in using the MDILog-II (5.79 ± 0.97), usefulness of MDILog-II (5.93 ± 0.73) assessed on a 7-point Likert-type scale (1 - very negative; 7 - very positive). Youth reported a usefulness score of 5.50 ± 1.91.
Elixhauser et al.	1990	Outpatient psychiatric clinic of the St. Louis Veterans Administration Medical Center	USA	Specialty Clinic	Bipolar affective disorder	93	93 enrolled adult patients	Adults	4-8 months depending on freqeuncy of visits set by the patient's provider (visits could be 2- or 4-monthly)	67/93	All patients who received a lithium prescription during the period from April 1, 1986, through March 31, 1987	Current diagnosis of schizophrenia, dementia, mental retardation, or alcoholism with no other psychiatric diagnosis listed; not responsible for their own medication taking; no longer receiving care at the medical centre; no longer treated with lithium	Electronic medication monitor for use with oral medications. Involves two plastic blister sheets, each containing 21 blisters holding patient's medication. The position of the blisters is updated every 15 minutes; if a blister is opened, the time is recorded. Data can be collected with a microcomputer. Printouts provide data on the timing of blister openings with a resolution of 15 minutes.	Electronic blister sheets	Self-report of medication taking behaviour; appointment-keeping; percentage of prescription refills obtained; serum lithium levels; medication-taking patterns (intervention group only)	Indirect	No		Monitoring of medication taking only between visit 1 and 2, then feedback of adherence based on electronic monitoring and lithium levels at visit 2, then follow-up at last visit 3. If non-compliance was evident, information was provided about approaches to improve medication taking. Medication received in the medication monitor.	Standard care (no monitoring) between visit 1 and 2, then feedback of adherence based on lithium levels alone at visit 2, then follow-up at last visit 3. Discussions about reasons for out-of-range values and suggestions for improving compliance provided. Medication received in a usual cylindrical vial.	Adherence - at visit 2 and 3	Patients in the monitored group aware that date / time of pill removal was recorded	3% (nss)	No difference in adherence from any measure was detected at any visit time point, though the percentage of prescription refills was higher (82% vs 69%) in the monitored group between visit 1 and 2 (effect of monitoring only). These differences disappear though after both groups received feedback (between visits 2 and 3) on adherence (74% int vs 81%). Overall prescription refill rate (76% int vs 7…	Worsened anxiety, depression and somatic complaints	Monitored patients reported higher levels of anxiety, depression and somatic compliants attributable to psychologic origins.	Not conducted
Erickson et al.	2005	Hypertension specialty outpatient clinic within a large university-affiliated medical center	USA	Specialty Clinic	Hypertension	42	42 subjects aged ≥ 21 years	Adults	3 months	37/42	Must be receiving care from the clinic, diagnosis of hypertension confirmed and documented; able to read and comprehend English; had two or more prescribed antihypertensive medications; BP > 140 mmHg systolic and /or >90 mmHg diastolic based on at least 2 readings in previous 3 months. Preference was given to patients with a documented history of non adherence; minimal other comorbidities or if p…	Patients with secondary causes of hypertension, other symptomatic comorbidities such as heart failure, chronic obstructive pulmonary disease, rheumatic conditions or severe osteoarthritis; or who were taking more than five medications prescribed for all disease conditions	Medication management system (MMS). The medication management system uses patient specific information to tailor the interactive technology to each patient, and aims to enhance adherence and communication between the patient ahd health provider. It includes the MedManager device which stores medication, provides reminder signals through an audio alarm and visual text message to alert patients to …	MedManager	Morisky 4-item adherence questionnaire; MMS adherence reports for intervention group	Direct	No		Medication management system with standard medical care. This MMS was customized for the patient's medication regimen, daily activities and any special instructions for administration based on patient, pharmacist and physician review.	Standard medical care alone	Adherence, BP based on 2 readings - at BL and end of study	Not stated	Change nss (no numbers as based on Morisky scores)	The change in adherence between the 2 groups was not significant, though a significant increase in self-reported adherence within the intervention group when compared to baseline was noted. This may be affected by the lower baseline adherence in the intervention group.	Greater BP lowering (Trend)	Although the differences did not reach statistical significance, the BP showed a greater lowering of both systolic and diastolic pressures than the control group.	Not assessed but two intervention group patients dropped out in first few days of study due to lack of interest in using the device.
Foster et al.	2014	General practices in Greater Sydney, Australia	Australia	Primary Care	Asthma	143	143 patients aged 14 to 65 years with moderate-severe asthma	Adults	6 months with just 2 study visits (enrolment, then follow-up) with telephone data collection at BL, 2,4 and 6 months	129/143	Suboptimal asthma control (ACT score ≤19), prescribed twice-daily ICS / LABA for 1 month or more	Asthma exacerbation (oral steroid use, emergency department visit, hopsitalisation) in the last month, use of budesonide / formoterol as maintenance and reliever therapy, major respiratory disease (e.g. COPD), serious uncontrolled medical conditions, clinically important visual or auditory impairment, shift workers with a variable roster, and pregnant or lactating women	SmartTrack electronic monitoring device with audiovisual reminder function for use with preventive medication. Records date, time and number of actuations used and uploads data monthly to a secure website. Asks 3 onscreen questions about asthma control each month	Smart Track	SmartTrack inhaler monitor records adherence	Both	Yes		Twice daily customizable audiovisual inhaler reminders and feedback (IRF) delivered by GPs vs personalized adherence discussions between the GP and patient about adherence (PADS) vs IRF + PADs. PAD involved a short questionnaire about barriers to inhaler use with a discussion about the key barriers with goal setting and achievement strategies	Usual care based on "Asthma Cycle of Care" including one-off checking and teaching of inhaler technique and writing asthma action plans. Patients were offered a record of their adherence after the study.	Asthma control- every 2 months; QOL, anxiety and depression, lung function, severe exacerbations - all at study end (6 months)	Yes - only GPs and patients in the 2 IRF groups were aware of the recording function of device; those in the non-IRF groups did not. The onscreen questions about asthma control served as a distractor.	27% (ss)	Over 6 months, adherence was higher in the 2 reminder/ feedback groups than the non-reminder/feedback groups (73 ± 26% vs 46 ± 28% of daily prescribed doses, P<0.001) but not between the PAD and non-PAD groups.	Improved asthma exacerbations (trend)	Asthma control improved overall but there was no difference among groups. Severe exacerbations were less in the IRF group (11%) compared to the non-IRF group (28%) once adjusted for exacerbation history but this was not significant (P = 0.06). No other differences in outcomes between the 4 groups though QOL, anxiety, and self reported adherence all improved overall in all groups. No changes were …	Evaluated via qualitative interviews of a subsample of participants{Foster, 2017 #647}. Mean satisfaction scores with the EMD was 82 (range 32-100). Three key themes were found relating to feasibility and acceptability of us; utility and behavioural impact of reminders, and sustainability.
Frick et al.	2001	Sexually Transmitted Disease and Family Planning Clinics, Coast Provincial General Hospital in Mombasa - the government referral hospital for the coastal region of Kenya	Africa	Specialty Clinic	HIV model but tested with multivitamins	140	140 women aged between 18 and 45 years	Adults	1 month	120 / 140 in final analysis	Willing to take a daily multivitamin for one month	Anticipated travel leading to unavailability for follow-up	RemindRx® - Microelectronic alarmed medication vial with programmable dosage administration times that records date / time when a button on the vial is depressed. The button also serves to silence the alarm. Data could be downloaded into a computer.	RemindRx (MEMS type)	Self-perceived compliance (patient interview), pill count, electronic medication vial recordings	Direct	No		Electronic medication vial with alarm	Electronic medication vial with no alarm	Compliance	No - participants had to press the button to record dose ingestion each time a dose was taken	46% (ss)	Women using the alarmed vial were significantly more likely to have good compliance (≥95%) than those in the non-alarmed group (82% vs 36%). Median rate of daily compliance was 100% in the alarm group vs 93% in the control (P<0.001); median rates of hourly compliance were 97% vs 87% in the alarm vs non-alarm groups respectively (P<0.001).	Not measured	91% (alarm) vs 76% (non-alarm) self reported 100% compliance; but 16% (alarm) and 36% (non-alarm) of those were found to have <100% adherence from the electronic vial.	Vial acceptability was high - 99% stated they would use the vial again and felt it was easy to use. Majority in the alarmed group (97%) felt the alarm helped them to take their medicaiton every day as directed.
Hardstaff et al.	2003	Renal and Liver Transplant Unit, Freeman Hospital, Newcastle-upon-Tyne, UK	UK	Hospital	Renal transplant	75	75 renal transplant adult patients	Adults	12 months	48/75	Stable renal transplant patient (>1 year post-transplant), willing to use a "SmartTop" bottle for their regular once daily prednisolone / azathioprine	Not listed	Smart Top bottle. These bottles have specialized lids containing a microprocessor that records date / time of bottle opening /closing. Informtion downloadable into a computer database.	SmartTop (MEMS type)	Smart Top monitor	Indirect	No		Received adherence feedback at first outpatient clinic appointment but then no further feedback	Received no feedback throughout the trial	Adherence - pre-feedback and post-feedback (note time to feedback varied between 2-6 months)	No	No numbers; but not statistically different (nss)	No difference in adherence was noted between the groups, either before or after feedback (26% improved in feedback group vs 20% in control; 26% improved post-feedback vs 8% in control).	Not measured	All pateints showed worsened adherence over time.	Not assessed
Hermann et al.	2011	Glaucoma clinic at the University Hospital in Athens, Greece	Greece	Specialty Clinic	Glaucoma	37	37 patients ≥18 years with glaucoma or ocular hypertension	Adults	4 weeks	36/37	Diagnosis of primary open-angle glaucome (POAG) or ocular hypertension (OHT), on established topical hypotensive therapy with brimonidine, no history of ocular surgery in past 6 months	Not listed	Electronic monitoring device for use with brimonidine eye drops 0.2%. Records time /date of use by measuring bottle motion and squeezing. Device not able to be separated from the bottle	Electronic eye drop monitoring device	Electronic monitor	N/a	No		Open adherence monitoring with brimonidine twice (BD) or three times daily (TDS)	Masked adherence monitoring with brimonidine twice or three times daily	Adherence throughout 4 weeks; Intraocular pressures - weekly	Dependent on group	-7% (BD), 3% (TDS) (nss)	No difference in adherence between those aware or not aware of adherence monitoring (70 ± 17% open vs 77 ± 6% masked for BD drops; 65 ± 14% open vs 62 ± 9% masked for TDS drops). Note BD group had 9 vs 9 in each group, TDS group had 10 (int) vs 8 (cont) groups	Not measured	Those on TDS dosing had lower adherence overall than on BD dosing (73 ± 13% BD vs 64 ± 12 % TDS)(P=0.02). However those on TDS regimen applied brimonidine more often (1.9 ± 0.3 TDS vs 1.5 ± 0.1 BD applications per day). There was a trend towards improved adherence in those aged ≥ 55 years)	Not assessed
Joost et al.	2014	Erlangen University Hospital, Germany	Germany	Hospital	Renal transplant	74	74 renal transplant pateints ≥ 18 years	Adults	1 year		German-speaking, independent of others for medication management or questionnaire completion, willing and able to repetitively visit the outpatient clinic of the Department of Nephrology and Hypertension, for educational training, pharmacy refill and medication event monitoring system (MEMS) data collection, on an immunosuppressive regimen including mycophenolate and willing to use MEMS	Not listed	Medication Event Monitory System (MEMS) caps	MEMS	MEMS, pill count, drug holiday occurrence, 4-item Morisky questionnaire, self-report	Indirect	No		Same as control plus an intensified pharmaceutical care programme targeting daily drug adherence in the year after transplant. This included additional inpatient and outpatient pharmaceutical care and counselling and a structured adherence management module focusing on adherence support. This was delivered during days 6-20 post transplant (3 x ~30 min sessions), then consultations with the clinic…	Standardized drug and transplant training including 15-page written information on medications, rejections, tumor risks, infections and a 1 hour training session from the transplant physician on medications, and another 1 hour from nurses regarding practical application of their medication. Follow-up visits with the transplant centre continued as per usual, but there was no additional contact wit…	Adherence (implementation element - daily adherence, timing adherence, taking adherence, number of drug holidays); trasnplant function; rejection rate, QOL, anxiety and depression,	No	Daily adherence 16% (ss), taking adherence 13% (ss), timing 1% (nss)	Patients in the intensified care arm had significantly better daily adherence (91% (95% CI, 90.52 - 91.94) vs 75% (95% CI, 74.57 - 76.09), P = 0.014) and taking adherence (95 ± 7.15% vs 82 ± 20.2%, p = 0.006). Timing adherence was not significantly different between the two though the intensified group was numerically better (95 ± 7.88% vs 94 ± 7.33%)). There were more patients without drug holid…	No effect on clinical	Rates of rejection were not different between the group but all who had rejection had adherence < 80% and at least one drug holiday. Transplant function improved in both groups and were similar at study end (Intensified 49 ± 14.3 mL/min vs control 46 ±15.4 mL/min). QOL and anxiety/ depression scores were not different between the groups	17/129 initial patients informed about the project did not want to participate due to use of MEMS; another 3/74 further patients withdrew after the study start due to denial of use of MEMS.
Matteson-Kome et al.	2014	Mid-western outpatient IBD clinic	USA	Specialty Clinic	Inflammatory bowel disease (IBD)	6	6 adults ≥ 18 years	Adults	3 months intervention phase with a 60-day screening phase to identify non-adherent patients (<85%) = total 5 months	5/6	Diagnosis of ulcerative colitis or Crohn's disease, on IBD maintenance medication (immunosuppressant or 5-aminosalicylic acid), ability to speak, hear and understand English, able to open MEMS caps, MMSE ≥ 24); non-adherence (<85%) as per 60-day screening phase	Not listed	Medication Event Monitoring System (MEMS Track Cap) electronic bottle cap that monitors dosing (not timing) of medications	MEMS	MEMS cap	Indirect	No		Continous self-improvement intervention (CSI) involving data evaluation and system refinement to help change behaviour by focusing on the patients' personal systems rather than on their motivation/ intention. It fosteres ritualistic and habitual health behaviours and requires less effort, motivation and intention to maintain changes. This involved a face to face intervention assessing MEMS data a…	Attention control intervention - face to face educational session presenting information on IBD education topics such as medical therapy, side effects, extra-intestinal manifestations of IBD and surgical modalities. MEMS also received	Change in personal systems thinking, adherence	Not stated	No numbers; but not statistically different (nss)	There was no statistically significant improvement in adherence found (P=0.14), though adherence improved in 3 of 4 of the CSI group and 1 of 2 in the attention control group, and MEMS change increased overall in the CSI group while the control decreased slightly.	Not measured	Mixed results seen with the change in personal systems thinking in the CSI group due to low numbers.	Not assessed
McKenney et al	1992	Residence in a retirement community or attending a primary care centre, Virginia	USA	Combination	Hypertension	70	70 ambulant patients ≥ 50 years	Older age	2 x 12 week phases	Phase I: 69/70; Phase II: 59/70	Diagnosis of hypertension entered by a physician on the patient's medical record; undergoing antihypertensive therapy for 12 months or more with 1 or more blood pressure lowering agents; willing to participate in the study	Not listed	Prescript TimeCap - an electronic compliance aid consisting of a medication vial with a cap displaying the last time the cap was removed.	Prescript TImeCap (MEMS type)	Pill counts	Direct	Yes		Timepiece cap alone (vs control) for Phase I of study; then timepiece cap alone vs cap + cards for recording BP readings at each clinic visit vs cap + BP recording cards + home BP monitoring and documentation in the cards	Standard medication vial	Adherence after 12 weeks; blood pressure - BL and periodically over 12 weeks at phase I, then repeated at phase II	Yes - patients unaware	17% (ss)	Those using the timepiece cap had a higher average compliance (95.1% vs 78%; P = 0.0002); less variation in compliance (62-111% vs 16-110%); lower % of non-compliant patients taking ≤80% of doses (8% vs 50%).	Greater reduction in BP	Those using the timepiece cap had greater average decreases in systolic perssure (7.6 mmHg vs 2.8mmHg) and diastolic pressure (8.8 mmHg vs 0.2 mmHg). Compliance increased with increasing number of adherence enhancing strategies (79 ± 23% to 94 ± 9% to 99 ± 11 % to 100 ± 7 %) but this did not translate in further improvements in diastolic BP (though systolic improved) . All 3 groups using the time…	Not assessed
Murray et al.	2007	University-affiliated, inner-city, ambulatory care practice - general medicine and cardiology practices of Wishard Health Services, Indianapolis, Indiana and Wishard Memorial Hopsital	USA	Primary Care	CHF	314	314 low-income patients ≥50 years with heart failure	Older age	12 months (9-month multi-level intervention with 3-month poststudy phase)	270/314	Planned to receive all of their care, including prescribed medications, at Wishard Health Services; had a diagnosis of heart failure confirmed by their primary care physician; regularly used at least 1 cardiovascular medication for heart failure (ACEI or ARB, diuretic, digoxin or aldosterone antagonist); were not using or were not planning to use a medication container adherence aid (for example,…	Patients with dementia	Medication Event Monitoring System (MEMS) V prescription container lids that recorded the time/ date of each opening and closing. The MEMS cap was labelled with the same icon as the container body to allow correct matching of medications.	MEMS	MEMS caps, refill adherence (for 9 +3 months), self-report	Indirect	No		Pharmacist intervention to improve adherence and health outcomes. Involved a baseline medication history, assessment of patient medication knowledge and skills, patient-centred verbal instructions and written materials about the medications, icon-based labelling of medications and a timeline to remind patients when to take their medications. The pharmacist monitored medication use, body weight, h…	Usual care which did not include patient-centred materials or any further contact with the intervention pharmacist besides an initial medication history	Adherence (taking and scheduling) at 9-months (refill data for 12 months); HF exacerbations requiring emergency department care or hospital admission - study end; QOL (3,6,9,12 months); patient satisfaction; direct costs	Not stated	10.9% (ss) but disappeared 3/12 post study (3.9% nss)	Medication adherence was higher in the intervention group (78.8% vs 67.9%). However these effects disappeard in the 3-month post-study period (70.6% vs 66.7%). Taking adherence was statistically greater in the intervention group for ACEI, beta-blockers, digoxin and loop diuretics. During the study, medications were taken on schedule more often in the intervention group (53.1% vs 47.2%) but this w…	Reduced ED and hospital visits, greater improvement in QOL and patient satisfaction	Emergency department visits and hospital admissions were overall 19.4% less (for all causes of admission) and annual direct healthcare costs were lower by $3165 in the intervention group, leading to cost savings of $2960 per patient (but this was not significant due to the large variability in costs). Taking adherence was found to be an independent, significant predictor of the number of hospital…	Not assessed
Okeke et al.	2009	Glaucoma services of the Scheie or Wilmer Eye Institutes	USA	Specialty Clinic	Glaucoma	66	66 patients ≥ 18 years	Adults	6 months (initial 3-month observational period of which 2 months of data from week2 - 10 were used, plus 3-month intervention period)	Not stated	Glaucoma (open angle, angle-closure, glaucome suspect, or ocular hypertension) treated with a prostaglandin analog in one or both eyes, took 75% or fewer doses (as measured in a an observational study using the travoprost dosing aid) during the initial 3-month period, able to return for 3- and 6-month follow-up visits	Unable to understand study, did not instill their own drops, incapable of using the dosing aid after a brief demonstration, or had undergone past laser or surgical glaucoma therapy within the 3 months prior to study enrollment	Dosing aid bottle - squeezes the drop from the bottle and records the time and date of delivery.	Dosing Aid for eyedrops	Dosing aid device; self-report	Direct	No		Educational video stressing importance of adherence, rationale, effects, and how to maximize adherence, a structured review of current barriers to drop taking and discussion of possible solutions with a study coordinator. Regular phone call reminders discussing administration, side effects, difficulties with drops - weekly for first follow-up month then every other week for next 2 months; plus au…	No additional intervention beyond being told it is important to take your eyedrops as prescribed	Drop usage adherence (3- and 6-months); side effects (6-months); visual acuity and IOP (3- and 6- months)	No - aware device recorded drop taking	22% (ss)	Intervention group adherence increased from 54 ± 17% to 73 ± 22% (P < 0.001) whereas the control adherence did not change from baseline (46 ± 23% to 51 ± 30%, P=0.16). The change in adherence was 19 ± 20% in the intervention group vs 6 ± 23% (P = 0.01). Mean adherence was higher for every week of follow up in the intervention group compared to control (P<0.01). 66% of the intervention group had a…	No effect on clinical	Intraocular pressure did not change between BL to 3-months nor from months 3 to 6 after intervention in both groups; there was no correlation of change in IOP with adherence rate change among both groups.	Satisfaction with the devices was measured at 3- and 6- months but not reported.
Onyirimba et al.	2003	Asthma Center at Saint Francis Hospital and Medical Center	USA	Specialty Clinic	Asthma	30	30 adult patients	Adults	10 weeks	19/30	Adults with moderate to severe asthma, prebronchodilator forced expiratory volume in 1 second (FEV1) < 80% predicted and 15% or greater reversibility after bronchodilator use, one or more markers of low socioeconomic status (Medicaid or no insurance, family income <$20000, less than a high school education), regular use of inhaled steroids, willing to change dosing schedule of inhaled steroids to…	Not listed	MDI Chronologs	MDI Chronologs	MDILogs	Indirect	No		Standard asthma care plus direct, nonjudgmental clinician-to-patient feedback discussion on their inhaled steroid and beta-agonist use (date/time of use) on all visits using electronic print-outs. This was fed back at days 7, 14, 21 and 42.	Standard asthma care including asthma education and development of a management plan (BL, days 7, 14, 21 and 42). Actuation data blinded to patient, clinician and other caregivers	Steroid adherence (weekly; number of days with overuse of inhaled steroids); albuterol use (24-hour and nighttime); FEV1 (BL and day 70); QOL (BL and day 70)	No - told that the devices recorded time and date of each actuation but blinded to study hypothesis	34% (ss)	Mean weekly inhaled steroid adherence over the first week was not significantly different (61 ± 9% vs 51 ±5% treatment and control respectively). By second week, adherence was 81 ± 7% (treatment group) vs 47 ± 7% (control) (P=0.003). Adherence remained >70% in the treatment group for the entire trial but decreased in the control group to below 30%. Overuse of inhaled steroids was low in both grou…	No effect on clinical	There was no difference in asthma outcomes between the groups. Albuterol use in the first week of the study was 1.81 ± 0.60 actuations per 24 hours in the treatment group vs 2.81 ± 0.42 (control)(P=0.20). Nighttime use in the first week was 0.80 ± 0.28 per night in the treatment group vs 1.44 ± 0.37 per night in the control (P=0.18). There was no significant within or between group differences in…	Not assessed
Kozuki et al.	2006	Community mental health centres in the Pacific North-west	USA	Specialty Clinic	Psychotic disorders	30	30 adult patients	Adults	3 months	28/30	DSM-IV diagnosis of schizophrenia, schizoaffective disorder or mood disorder with psychotic features, prescription of at least one atypical antipsychotic in pill form, ability to be responsible for daily execution of regimen	Primary diagnosis substance abuse or dependency; comorbidity with mental retardation or developmental disability	eDEM - Electronic monitoring cap that records dailky excecution of the regimen and produces a chronology of the time the medication was taken each day. Information can be downloaded and presented on a computer screen.	eDEM (MEMS type)	Electronic monitoring device; blood plasma drug concentration levels; pill counts	Indirect	No		Visual-feedback therapy with structured psychodynamic therapy and visual feedback via monitoring cap to increase insight about medication behaviours and work on affect dimensions. Delivered every 2 weeks for 3 months. Focus is on both behaviours and emotional needs of persons with psychotic disorders and has both a behavioural (insight into pill-taking and acceptance of medications with aim to im…	Supportive counselling group - attentive listening only therapy technique used. Issues related to the medications not discussed. Delivered every 2 weeks for 3 months for 20-30 min per session. Used to control for confounding of attention from therapists.	Psychotic symptoms (BL, 1, 2, 3 months)	Not stated	19.5% (ss)	Adherence rates of the intervention group slightly increased compared to a deline in the control group (P=0.026) (rates at 2,4,8,12 weeks were 78.4% vs 88.5%; 90 vs 82.3%, 85% vs 75.9% and 87.9% vs 68.4% int vs cont).	Improved PANSS (trend)	The intervention group had a higher percentage of subjects whose drug plasma level incresaed (P=0.022). No difference was found between the two groups for psychotic symptom scores, though there were trends in improvements for the intervention group (PANSS positive change 20.7 to 20.0 intervention; 21.2 to 23.0 control; negative change 18.2 to 17.9 intervention; 18.7 to 19.7 control).	Not assessed
Rosen et al.	2004	Primary care clinic at the VA Connecticut Healthcare System	USA	Primary Care	Diabetes	79	79 adult patients enrolled but only 33 had lower than 80% baseline adherence and were randomised	Adults	4 months intervention + 3 months follow-up (no intervention, assessment only)	33/33	Prescribed metformin, demonstrated less than 80% adherence in the 4-week baseline run-in phase, mini-mental status exam score > 23, willing and able to use the electronic pill caps for the metformin	Not listed	MEMS caps / Smart Caps	MEMS	MEMS and self-report	Both	Yes		Cue-dose training with Smart Caps that display the number of hours since last bottle opening - programmable to beep at pre-determined times. Patients instructed to consider cues to remind them to take the medication with opportunities to discuss barriers to adherence. MEMS data given to health providers each month - and if patients had scheduled appointmens, the MEMS data would be discussed with …	Supportive counselling for first 5 patients based on self-reported (not MEMS) data but the supportive counselling had elements of the active intervention as the same people gave the counselling so the next 12 patients had assessments only with no active counselling and no presentation of MEMS data to providers	MEMS and self-reported adherence - every 4 weeks; HBA1c at 4 weeks pre-intervention then at weeks 4, 12, 20, 28	No - MEMS ability to record bottle opening described	15% (ss)	Mean improvement in adherence of 15% in the intervention group to metformin (~60% increased to 80% but control group remained at ~60%; P=0.017); improvements noted for other antihyperglycemic medications too but as only 17 patients were on a second medication, thie was not significant (P=0.50). No difference between group when self-report used. Adherence decreased though after intervention was di…	No effect on clinical	There was little change in either group's HbA1c from baseline and HbA1c did not differ between groups.	A significantly higher proportion of patients in the intervention group knew that the MEMS caps recorded the data/ time (87.5% vs 11.8%, P<0.001). Providers and patients also rated the process of reviewing the MEMS adherence data in 9/16 of the intervention group. Found both the patient and provider found it 'helpful' in the moderate range (1 = not at all, 5= extremely) (patient 3.9 ± 0.93; provi…
Rosen et al.	2007	HIV clinics in the greater Hartford, Connecticut area	USA	Specialty Clinic	HIV	56	56 adult participants	Adults	32 weeks	36/56	Prescribed antiretroviral medication, able and willing to use MEMS-compatible bottles, had ever used an illicit drug weekly for 1 year, had a score on the Mini-Mental State Exam of 23 or higher and had taken 80% or fewer of their prescribed doses within 3 hours of the prescribed time in a baseline adherence measurement phase.	Not listed	MEMS caps with downloaded data to a computer. Print out shows date and time of each bottel opening over the preceding weeks and the list of doses taken	MEMS	MEMS data, self report during the preceding 3 days using a timeline follow-back approach, visual analogue scale ratings of the percentage of doses taken in the preceding month. Random blood samples of antiretroviral levels from some participants also done to check it reflected MEMS data.	Indirect	No		Weekly contigency management-based counselling for 16 weeks then 16 weeks of additional data collection. At counselling, data from the MEMS caps were reviewed with patients to identify circumstances surrounding missed doses and identified cues to remind them to take the dose. Responses to the medications, routines for medication taking and efforts to cope with HIV also reviewed. Brief substance a…	Weekly supportive counselling for 16 weeks as the "attention control" condition. Participants were asked about their adherence and offered support for efforts to improve adherence. MEMS data was not reviewed with the participants though and urine toxicology testing not conducted. Only an initial review of substance abuse was done and referrals made for treatment. Monthly letters on adherence (sel…	Adherence (BL, every 4 weeks); viral load (BL, weeks 16 and 32); side effects (every 4 weeks); substance use (monthly)	Not stated	32% (ss)	Mean MEMS-measured adherence to the reinforced medication increased from 61% to 76% in the 16-week treatment phase and was higher than the supportive counselling group (59% to 44%) (P=0.01). This difference wast lost in the 16 weeks of follow-up - no difference between the groups (P=0.07). Those receiving the intervention were more likely to achieve 95% adherence in weeks 1-16 than the control (P…	Reduced viral load, but improvements lost on follow-up	Mean log-transformed viral load was significantly lower in the intervention group at 16 weeks but after another 16 weeks of follow up, differences were lost. The viral load through weeks 1-16 was found to be related to improved adherence. Proportions of positive urine toxicology tests did not differ between the groups at any phase (and the monetary rewards did not fuel illicit drug use). There wa…	Not assessed
Rigsby et al.	2000	Department of Veterans Affairs HIV clinic and the University of Connecticut Infectious Diseases Study Center - a community-based HIV clinical trials site in the City of Hartford Health Department in Hartford, Connecticut	USA	Specialty Clinic	HIV	55	55 HIV-infected adult subjects	Adults	12 weeks (intervention 0-4 weeks, then follow-up at weeks 8 and 12).	46/55	Current treatment with any antiretroviral medication and stable on these medications - enrolment deferred if there was an anticipated change in medication regime during the next 12 weeks	Subjects who scored 23 or less on the Folstein Mini Mental State Exam, relied on others to administer medications, or could not accommodate the use of MEMS devices in their daily routine	MEMS caps - fixed to the medication with the lowest baseline adherence in the 1-week baseline period	MEMS	MEMS - opening of pill bottle within 2 hours of predetermined time - analysed weekly relative to control; zidoviudine concentrations - sampled in 10 patients to check if it reflects MEMS data.	Indirect	No		Weekly sessions for four weeks of cue dose training with MEMS feedback (CD), or cue dose training with cash reinforcement for correct bottle openings (CD + CR). Cue-dose training linked medication taking to daily habits as cues and used MEMS data to reveal missed doses and suggest alternative cues. Contingency reinforcement using graduated cash payments at each weekly meeting for 4 weeks based on…	Non-directive inquiries about adherence - asked about adherence in the week preceding the visit and encouraged to improve adhernce. MEMS data not fed back.	Adherence; viral load (BL and week 12)	Not stated	Change ss higher in the CD +CR group (no numbers reported) but reduced after discontinuation of training	Adherence was higher with the CD+CR group for each week of active training but not in the CD group when compared with the control. There was a significant increase over time in adherence for the CD +CR gorup (P=0.0005) but not the CD group (P=0.79). The adherence was also seen with the medications that were not the target of the reinforcement. Adherence declined in the 8 weeks after discontinuati…	No effect on clinical	There was no differences in viral load change between each of the groups (+0.64 in the CD +CR group, -0.29 in the CD group, +0.34 control). Although high levels of baseline adherence was associated with low viral loads, there was no consistent effect of improved adherence on viral replication (some had high adherence but had a high increase in viral load).	Not assessed
Ruppar	2010	Senior centers, senior living facilities, churches in 2 Midwestern US cities	USA	Combination	Hypertension	15	15 subjects aged 60 years or older	Older age	28 weeks (8 week run-in period + 8 week intervention + 12 week follow-up)	15/15	60 years or old, taking at least 1 prescription antihypertensive medication with no antihypertensive prescription changes for 30 days at the time of study entry, able to read, write, and converse in English, diagnosed with hypertension (based on participant report), self-administering his/her own medications without prompts from any other person or device, non-adherent to their antihypertensive m…	State of severe hypertension (BP of 9180/120 mm Hg) at the time of study enrollment, resided in a residential facility where medications were administered by facility staff, terminal chronic illness with a life expectancy of 6 months or less	MEMS electronic medication bottle cap with a digital display that provided daily adherence feedback of date and time of opening of the bottle during the 8-week intervention	MEMS	MEMS cap (SmartCaps for the intervention group with an LCD readout on the top of the bottle to indicate number of times the medication bottle has been opened since midnight and number of hours since last opening to allow participants to determine whether they had taken their daily dose(s) for the day)	Both	Yes		Behavioural feedback intervention with biweekly medication adherence and BP feedback (participants were informed of their adherence rate since the last visit and were shown a graphical display of their adherence behavior to date; degree of change in the participants' BP discussed and how it could have been impacted by improvements in adherence), habit counselling, review of medication-taking skil…	Received no adherence feedback and was seen by the investigator at weeks 12 and 20 only. Educational materials on managing arthritis pain were provided.	Adherence (timing adherence - % of prescribed doses within +/- 25% of the prescribed interval, downloaded adherence data at each of the 4 fortnightly visits), BP (2, 4, 6,8 12 and 20 weeks)	Not stated	80% (int; ss) vs 54.3% (after follow-up; nss)	Treatment group had better antihypertensive medication adherence than the control group (median adherence improved 15.4% with the treatment group whereas the control group had -5.6% in adherence, P=0.003). Change during the intervention from 75.5 to 96.4% (int) vs 34.1 to 16.40% (control); at week 20 (after 12 weeks follow-up) the intervention adherence = 94.3% vs 40% in control.	Greater reduction in BP	Systolic BP improved slightly in the intervention group during the study and was significantly different at week 12 (median systolic BP lowered to 130 between BL and week 12 vs an increase to 152mmHg in the control, P = 0.008). At week 12, 80% of the intervention group had controlled systolic BP but none in the control had controlled systolic BP (P=0.007). More also had controlled diastolic BP (9…	Participants reported a sense of benefit from the intervention - particularly from the feedback components. Reported the primary benefit was from adherence and BP feedback. The participants looked forward to receiving information about their adherence level and BP control. Many intervention participants would compare their adherence and BP levels with those from their prior visit to gauge their p…
Russell et al.	2011	Tertiary care transplant center located in the Midwestern United States	USA	Hospital	Renal transplant	15	15 adult renal transplant recipients aged 21 years or older	Adults	9 months (3 month screening phase + 6 month intervention)	15/15	21 years of age or older, prescribed at least one, twice daily prescribed, immunosuppressive medication, non-adherent with immunosuppressive medication as evidenced by a medication nonadherence score of <0.85 in the screening phase, functioning kidney transplant, transplant physician and nephrologists’ assent that recipient is able to participate in the study, ability to speak, hear, and understa…	Not listed	MEMS Track cap - date and time of removal of the cap from the vial	MEMS	MEMS Cap - adherence within a 3-hour window of the prescribed twice daily time frame; medication scores were allocated depending on whether the dose was taken within 3 hours (0.5), 3-12 hours (0.25) or not at all (0).	Indirect	No		Continous self-improvement intervention (CSI) involving collaboration between the participant and clinical nurse specialist on identification of the person's life routines, important people, possible solutions to enhance medication taking. Monthly medication taking feedback was also delivered via a graphic printout of daily adherence from electronic monitoring. This was conducted monthly during t…	Attention control - provided with educational brochures from the International Transplant Nurses Society to address healthy post-transplant behaviours. The first brochure was delivered via a home visit and subsequent brochures were mailed. Monthly phone calls to review the brochures and ask participants if they had any questions about the information were made to provide equal attention time and …	Adherence		No numbers; but statistically improved (adherence scores) (ss)	Mean medication adherence score for CSI group higher than control (P=0.03) with a large intervention effect size (Cohen's d= 1.4; r= 0.6).	Not measured	Nil	Participants felt the intervention took "very little" or the "right amount" of time
Sabin et al.	2010	Dali Second People's Hospital in Dali, Yunnan province, China	China	Hospital	HIV	80	80 enrolled, 68 subjects ≥18 years old randomised	Adults	12 months (pre-intervention phase months 1-6 of monitoring without providing electronic monitored data to them or their clinicians to identify high or low adherence for stratification; intervention period months 7-12)	64/68	On antiretrovial therapy and aged 18 years or above	No exclusion criteria	Med-ic - Electronic drug monitor pill bottle	Med-ic (MEMS type)	Electronic drug monitor (monthly download), self-report reflecting medication-taking behaviour during the previous week and month	Indirect	No		Counselling with feedback from electronic drug monitors. Data from the monitor downloaded each month and the previous month's data was reviewed with the patient. Those with less than 9% adherence were flagged for counselling with a physician or nurse using the monitor adherence data afer the clinic. Data was provided to both the patient and the clinician as a printout with the percent of doses ta…	Standard care with no feedback of collected adherence data to the patient nor the clinician. However - those whose monthly written self-reports indicated < 95% adherence also received further conselling. The main difference with the control is that the 'flagging' for counselling relies on self-report rather than electronic drug monitor data.	Adherence (proportion taken within dose time - within 1 hour of scheduled dose time); CD4 count and HIV viral load (BL, randomisation - month 6, post-intervention - month 12)	No - aware of the monitoring of the data	12% (ss)	Mean adherence at randomisation was 86.8% vs 83.8% in the intervention vs control groups but at month 12 mean adherence had increased to 96.5% in the intervention group but was unchanged in the control at 84.5% (P=0.003). The intervention group had an increase in adherence of 9.7% (P=0.008) but there was no change in the controls (only 0.7%, P=0.89). 83.9% had ≥95% adherence at month 12 compared …	Improved CD4 count but not viral load	The intervention was not associated with mean CD4 count at month 12 though a higher proportion of subjects experienced an increase in CD4 (71.0%) than the control (48.4%)(P=0.07). Mean CD4 count at month 12 rose by 90 cells/microlitre in the intervention group but declined by 9 cells/microlitre in the control (P=0.02). Proportion of subjects with RNA <400copies/mL at month 12 did not differ signi…	Not assessed - though the monitor use did require a moderate degree of training. Basics required a full day of training and practice with local staff. After the first month of implementation, both staff and patients were comfortable with the technical details of monitor use. Sustaining the intervention was not burdensome.
Smith et al.	2003	Hospital-based infection disease clinic at the University of North Carolina Hospitals in Chapel Hill, NC	USA	Specialty Clinic	HIV	43	43 individuals ≥18 years	Adults	3 months but clinical outcomes assessed within 1 year of randomisation	Not stated	HIV-1 infection, aged 18 years or older, willingess to give informed consent, starting or switching to a new protease inhibitor regimen	Not listed	MEMS electronic monitors on medication bottles	MEMS	MEMS	Indirect	No		Self-management intervention based on feedback of adherence performance and principles of social cognitive theory and self regulation - 3 components of information exchange, skills development and social support enlistment. The program included medication education as per the control group, skills training and development exercises, monthly visits for medication consultations and one-on-one couns…	Usual care with medication education - written and verbal - and assistance with scheduling of doses. Strategies to improve adherence were discussed. No follow-up visits	Self-efficacy to take medications on schedule in different situations (monthly); adherence (80% or more doses per week)	No	59% (ss)	Individuals in the self-management group signficiantly more likely to take 80% of more of their doses each week than individuals in the control group (OR = 7.8, 95% CI 2.2-28.1). Average weekly adherence was higher in the self-management group at all time points. Average adherence increased over time and by 12 weeks average weekly adherence in the intervention group was 96% vs 37% in the control …	Reduced viral load (Trend)	No differences in self-efficacy by treatment group between subjects (P=0.36) or within subjects over time (P=0.23). 64% in the self-management group had at least one viral load of 400 copies or less compared to 38% in the control group but not significantly different (P=0.22).	Not assessed
Sutton et al.	2014	Primary care clinics in Oxfordhire, Buckinghamshire, Suffolk, Essex, Huntindonshire	UK	Primary Care	Diabetes	226	226 adults ≥18 years	Adults	8 weeks	184/226 for adherence analysis; 193/226 for HbA1c analysis	18 years or over with Type 2 diabetes of at least 3 months' duraction, able to give informed consent, currently taking any oral glucose-lowering agent, HbA1c ≥58mmol/mmol (7.5%), deemed by general practitioner to be appropropriate for tight glycemic control and independent in medication taking		TrackCap	TrackCap (MEMS type)	Self-report (Medication Adherence Report Scale) and MEMS (whether or not the correct number of doses was taken each day over 8 weeks) for interventiong group only	N/a	No		Electronic container for medication	Standard medication packaging	Adherence about medication use in the last month (week 8), HbA1c (week 8)	No	No numbers (adherence scores), but not statistically significant improvement (nss)	Higher adherence was found in the electronic container group (P=0.11). The proportion adherent over time seemed to reduce but was not statistically significant.	Improved HbA1c (trend)	Lower HbA1c with the intervention (P=0.25). Those who used a pillbox had no different effects (P=0.11 for adherence, P=0.71 for HbA1c)	Not assessed
Tashkin et al.	1991	John Hopkins University and UCLA	USA	University	COPD	237	237 adults of a larger intervention group that received a group based smoking cessation program, education, counseling and NRT	Adults	12 weeks (4 months)	197/237 (40 forgot devices, missed the appointment or had malfunctioned devices)	Evidence of mild to moderate airflow obstruction (FEV1/FVC ratio ≤70% and FEV1 of 55 to 90% of predicted) but otherwise in good health. Smokers were eligible only after a 3-stage screening procedure with pulmonary function testing, questions about general health and medical illnesses and willingness to consider smoking cessation	Not listed	Nebulizer Chronolog - small, portable electronic device housing a pMDI -records the date and time of each actuation and is read out by an IBM PC	Nebulizer Chronolog	Nebulizer Chronolog, canister weights, self-report	Indirect	No		Informed of the function of the chronolog and given feedback of the adherence information to enhance adherence. For the feedback participants, the chronolog memory was read by the interventionist on several occasions over the 12-week program. If the feedback participants were not using the bronchodilator three times per day at appropriately spaced intervals or were not using 2 actuations per set,…	Blinded to adherence monitoring function of the device.	Adherence	85 did not know the chronolog was recording the time/date of each actuation (uninformed group); 112 were informed and given feedback of the information to enhance compliance (feedback group)	26% (ss)	In the control group 87% self-reported inhaler use at least twice a day, but only 52% had used it two or more times daily as per the chronolog. In the feedbak group, 89% self-reported adherence, but only 78% had used the inhaler two or more times daily from the chronolog. The proportion of feedback participant with satisfactory compliance was significantly greater than the proportion of compliant…	Not measured	Not assessed	Not assessed
van Onzenoort et al.	2012	Maastricht University Hospital, Maastricht, The Netherlands and surrounding general practitioners' practices	Netherlands	Combination	Hypertension	470	470 patients ≥18 years with mild-moderate hypertension as part of a larger HOMERUS trial	Adults	1 year with seven follow-up visits (a placebo run-in period of 4 weeks was also conducted before study initiation)	Not stated	Patients aged 18 years and older with office BP above 139mmHg systolic and /or 89mmHg diastolic at both initial study visits	Not listed	MEMS V TrackCaps	MEMS	MEMS and pill count	N/a	No		Adherence monitoring with MEMS (but adherence was not fed back) and pill count	Adherence monitoring by pill count alone	Adherence - percentage of days with correct dosing (MEMS opened once every 24 hours), BP based on 3 consecutive measurements (7 visits during 1 year - monthly after 3rd visit, 2-monthly after 5th visit), drug changes and number of drugs used	No - both groups aware of adherence monitoring by MEMS or pill count	1.9% (nss)	Based on pill counts - median adherence did not differ between the two groups (96.1% (88.8-98.4 IQR) (int) vs 94.2% (control); P=0.97).	No effect on clinical	Mean number of defined daily doses prescribed were higher in the intervention group (2.3 vs 1.9, P=0.001) and increased in both throughout the study. The number of DDDs was positively associated with adherence (P=0.008) regardless of group (P=0.79). 89% in the intervention group had one or more dose adjustments or drug additions compared to 81% in the control (OR 1.51, 95% CI 0.87-2.71) which may…	Not assessed
Velligan et al.	2013	Community mental health center from 2 counties in Texas	USA	Specialty Clinic	Schizophrenia	142	142 patients aged between 18 and 60	Adults	9 months after 1 month baseline assessment of adherence monitoring with the MM and pill count	132/142	Diagnosis of schizophrenia or schizoaffective disorder and under medication follow-up at the community mental health center, aged between 18 and 60, receiving ongoing treatment with an oral antipsychotic, had primary responsibility for taking own medications, had missed at least one dose of medication in the preceding week, had a stable residence, able to understand and complete assessments.	On depot antipsychotic medication, had a hospitalization in the past 3 months (risk of drop out due to readmission), documented history of significant head trauma, seizure disorder, mental retardation, history of substance abuse or dependence in the past month, history of violence in past 6 months (safety for home visits)	Med-eMonitor (MM) - an electronic medication monitor that prompts use of medication, cues medication taking, warns patients when the wrong medication is taken or at the wrong time, records complaints and alerts staff of failures to take medication as prescribed	Med-eMonitor	Electronic monitor (all groups received a MM, but only the MM group had the monitor set to prompt adherence), pill counts	Both	No		PharmCAT (in-person) - supports medication taking with an array or environmental supports e.g. using pill containers, signs, alarms, checklists established in weekly home visits from a PharmCAT therapist vs Med-eMonitor (electronic) adherence intervention which is the only support and only contact is via phone if patient missed doses (adherence server checked every 3 days); phone contact addresse…	Treatment as usual - case management and psychiatry appointments at the community mental health center	Adherence, positive symptoms, global function (BL and every 3 months); contact with emergency services and police (every 3 months)		19% (ss)	Adherence significantly better with either PharmCAT or Med-eMonitor than control at all time points (p<0.0001); NNT 1.9. Adherence ranged from 91% (MM) and 90% (PharmCAT) vs 72% in the control. Differences between PharmCAT and MM not significant (P > 0.43). By pill count, PharmCAT had higher adherence (91%) than MM (86%), P=0.04, or control (P=0.0001). Difference between MM and control was almost…	No effect on clinical	No differences in clinical outcomes for symptom and global functioning scores. 27.7% in the MM group, 33.3% PharmCAT and 34% control group had contact with hospital or emergency psychiatric services; no difference between groups (P=0.77). Time to use of these services did not differ. MM group more likely to drop out of study (29.8%) vs PharmCAT (8.3%) and control (17.2%) (P<0.046).	In 21 PharmCAT and 16 MM patients, satisfaction scores (1 not at all to 7 extremely satisfied) were higher in the PharmCAT (6.80 +/- 0.54) than MM (6.10 +/- 1.61; P=0.11). 5% in PharmCAT vs 38% MM complained about the treatment (P=0.012) - primary complaint was beeping of the device.
Wilson et al.	2010	Two academic, medical centers, a community health center, general medicine practice and private infectious diseases practice in the US	USA	Combination	HIV	156	156 adult patients	Adults	6 study visits (BL, visits 1-4 before a provider visit, final (6-12 weeks after 4th provider visit)	106/156	Current use of HIV antiretrovirals, detectable HIV RNA at most recent clinical visit, willingness to use an electronic pill bottle cap for one of the antiretroviral medications for duration of the study, fluency in English	Non-detectable viral load at most recent clinical visit	MEMS cap	MEMS	MEMS, self-report (adherence in the last month)	Indirect	No		Cross over study. Three-page report of MEMS adherence data given to physician prior to a routine office visit. Self-report data on adherence, patients' beliefs about therapy, reasons for missed doses, alcohol and drug use and depression also given to the physician. Group 1 - received the report prior to the 2 consecutive visits followed by 2 visits with no report. Group 2 - no report for first 2 …		Adherence (at each visit), HIV viral RNA levels	Not stated	2 (nss)	There was a trend toward an intervention effect; adherence was 2.0% higher in the intervention group but not significantly higher (P=0.32). Data from self-report were similar.	No effect on clinical	Intervention visits had more total utterances (median 360 vs 311.5, P=0.03). There was a trend toward more total adherence-related utterances in the visit (median 76 vs 49.5; P=0.07) and a signficant increase in utterances about the current regimen (median 51.5 vs 32.5, P=0.0002) in the intervention vs control visits; less than 10% of these utterances were "problem solving" in content though and …	Not assessed
Wu et al	2006	John Hopkins Moore (HIV) clinic	USA	Specialty Clinic	HIV	64	64 patients ≥18 years	Adults	6 months	48/64	Three or fewer highly active antiretroviral therapy (HAART) regimens or were treatment naïve, at least 18 years old, able to self-medicate	Dementia that limited ability to provide informed consent, insitutionalized, or had experienced more than 3 HAART regimens prior to study enrollment	Disease Management Assistance System (DMAS) - a prompting device that verbally reminds patients at medication times and records doses when manually pushed; also eDEM to measure adherence	DMAS	DMAS and eDEM	Direct	No		DMAS + monthly 30 minute adherence educational session	Education only	Adherence (eDEM - monthly), Quality of life (BL, weeks 24), DMAS use - frequency of use, reasons for lack of use (weeks 4 and 20), Neurocognitive functioning (BL, week 24), CD4 and plasma HIV RNA levels (BL, weeks 12 and 24), depression and role functioning	Not stated	20% (ss) - already reported in Andrade study	Adherence was improved with 77% vs 57% from main study (Andrade);	Worsened QOL (trend)	At month 6, DMAS participants had some deterioration in QOL scores whilst controls had improved, even after controlling for other factors. 83% in the DMAS group used DMAS to manage medicines some or all of the time at week 4, and 88% at week 20; 1 did not use the device.	Most common reasons for not using DMAS was leaving at home, two reported this was usually when they went out. Anecdotal feedback that the device was too large and too loud, resulting in unwelcome questions and possible exposure of HIV status. When it beeped, most listened to the message;l 57% never skipped in the past 4 days at week 4, 75% in week 20; 3 skipped the mssage 4 or more times in the p…
Nides et al.	1993	University of California at Los Angeles and John Hopkins University.	USA	University	COPD	251	251 patients aged 35-60 years	Adults	4 months	205 /251	Subset of larger population of the Lung Health study. Participants were aged 35-60 years, active cigarette smokers, spirometric evidence of mild- moderate airflow obstruction (FEV1 :FVC ratio 70% or less and FEV1 of 55% to 90% or predicted)	Serious health problems that might limit study participation or life expectancy, or regularly using a bronchodilator or beta-blocking agent	Nebulizer Chronolog -a microprocessor device recording time and date of actuation that can be downloaded into an IBM-compatible computer	Nebulizer Chronolog	Self-report, canister weight, Nebulizer Chronolog	Indirect	No		Patients informed about the function of the device and received printed copies of their EMD record of inhaler use at end of weeks 1 and 7 of the 12-week smoking cessation program. The health educator and participant jointly reviewed the pattern of inhaler use - praise given if usage satisfactory, and behaviourals trategies developed for problem areas. These feedback sessions continued at each 4-m…	Patients only told the device recorded amount of inhaled drug use - no information given that it was able to record patterns of use. No feedback given	Adherence - at 4-month follow-up; data from EMD used to measure percent-adherent days	Yes - In control group	20.3% (ss) (% of sets with 2 actuations or more); 19.8% (ss) more adherent days	The feedback group averaged significantly closer adherence to the prescribed three inhaler uses per day (1.95 +/- 0.68 vs 1.63 +/- 0.82 sets per day, p=0.003); the feedback group averaged 23% more sets per day than the control. Significantly more feedback group participants averaged 2 or more sets per day than the control (p=0.0003). Feedback group had a greater mean percentage of sets with the p…	Not measured	Self report matched 44% of the feedback participants data cf 25% in the control (P<0.007). Controls overestimated actual use by at least one adherence category (71%) vs 49% (feedback group) (p<0.002)	Not assessed
Dobbels et al.	2017	University Hospitals of Leuven, Belgium		Hospital	Heart, liver and lung transplant	205	205 adult patients aged 18 yearsr or older	Adults	6 month with 3-month run-in phase to establish adherence levels. Follow-up at 12 months (6 months post intervention) to test waning effect; and again at 5 years to check time to clinical event	149/205	Received single heart, liver or lung transplate ≥1 year ago, attended an outpatient visit minimally every 3-4 months; treated with tacrolimus twice daily and provided informed consent. Patients had to be 18 years or older	Multiorgan transplants, patients who did not manage medication independently, patients who switched immunosuppressive regimens in the previous 4 weeks, patients with a terminal illness, patients who were on the waiting list for a retransplant, patients with severe cognitive problems, and patients who were or had a desire to become pregnant	Helping Hand Data Capture device. Device has tablet blister cards and has a reminder to remind patients to take their medication. It records compliance by recording the date / time of each blister card removal.		Electronic monitor, Basel Assessment of Adherence to Immunosuppressive medication (self-report interview)	Both	Yes		Theory-based multicomponent staged tailored medication adherence intervention - with intervention manual, algorithm and scripts to highlight which behaviour change techniques to apply. Multicomponent tailored behavioral interventions (visits2–4) building on social cognitive theory and trans-theoretical model (e.g.electronic monitoring feedback ,motivational interviewing).	Usual care - asked to use Helping hand thorughout study and complete all visits to control for attention bias (research talked about non-medication topics for 20-30 mins)	Adherence (self-report month3,6,9,15), clinical event-free survival (5 years)	No-both groups informed of Helping hand functions	Significant improvement in adherence; Atbaseline,averagedaily proportionsofpatientswithcorrectdosing(82.6%IG,78.4%CG)andtimingadherence(75.8%IG,2.2%CG)werecomparable.TheIG had a 16% higher dosing adherence post-intervention(95.1%IG, 79.1%CG; p o 0.001),resulting in odds of adherence being 5 times higher in the IG than in the CG (odds ratio 5.17, 95% confidence interval 2.86–9.38).	Report on proportion of patients given OR not mean % adherence, convert using Chinn's formula. Adherencedataof 12patients couldnotbedownloadedatstudyendbecauseof technical problems, resultingin74 patientsintheIGand75 patients in the CGhavingcompletedata.	Patient and graft survival until 5 years after transplantation. In the IG ,5-yearclinicalevent-free survival was 82.5% vs 72.5% in the CG (p =0.18)	Adherence change sustained at end of follow-up; for IG, 5-year clinical event-free survival was 82.5% vs 72.5% in CG (P=0.18)	Not assessed
Forni Ogna et al.	2016	Cardiology interventional unit of the Lausanne University Hospital		Hospital	PCI with stent	123	123 adult patients	Adults	6 months	117/123	All consecutive adult patients admitted to the cardiology interventional unit of the Lausanne University Hospital for elective PCI. Patients were enrolled if they had undergone PCI with implantation of at least one stent and had been prescribedmaintenance treatment with clopidogrel 75 mg day–1 for at least 6months.	The main exclusion criteria were: ST-segment elevation and non-ST-segment elevation myocardial infarction within 30 days prior to randomization.	MEMS cap		MEMS, VASPRI	Indirect	No		standard of care + adherence electronic monitoring group, in which drug intake was recorded but kept blinded until the study end, versus another intervention group - an integrated care group, with regular feedback on recorded adherence. Integrated care group (IC) = downloaded data every 6/52 and fedback at follow up in semistructured motivational interviews with nurse, or pharmacist, and patients…	standard care	VASP-PRI (platelet reactivity index) BL, 3m and 6m	No likely aware of the feedback group	Signficant improvement; IC adherence was 101 (94-102)% versus 99 (83-101%) in the SOC+EM group (p<0.001); correct addherence was 99 (93-100%) vs 98 (80-100)% in SOC+EM group	Medication adherence was higher and less variable in the IC group: median (min–max) Tac 101 (94–102)% vs. 99 (83–101) % in the SOC + EM group; P < 0.001; median (min–max) correct adherence 99 (93–100) % vs. 98 (80–100) % in the SOC + EM group; P < 0.001.	No different between groups for VASP-PRI	However, adherence (P = 0.035) and baseline VASP-PRI (P = 0.015) were associated with VASP-PRI at 3 months and 6 months. The association between adherence and VASP-PRI was lost in patients with baseline VASP-PRI > 50%. Diabetes, CYP2C19*2 carrier status and body mass index were significant predictors of VASP-PRI.	Not assessed
Henriksson et al.	2016	Karolinska University Hospital in Stockholm, Sweden		Hospital	Renal transplant	80	80	Adults	1 year	74/80	Patient should understand the informed consent form and agree to participate in the study; the consent of both parents was required for underage patients	None	EMD with cellular capabilities (tracking device via Global System for Mobile Communications)		EMD but only in the intervention group. Drug compliance in the control group was not assessed, because patients in this group did not use the EMD. Cannot include in meta-analysis as control group no adherence data.	Direct	Yes		The patients loaded the EMD with a week's worth of medication at a time. At the prescribed time for taking the medication, the EMD gave visual and audible signals. If the patient did not take their medication, the audible signal was repeated with increasing frequency for 120 minutes. After this (or after the medication was taken), the EMD sent an SMS message to the webbased software, thus providi…	standard care, no EMD	Parameters for adherence, renal function (S-creatinine), tacrolimus concentration (B-tacrolimus), information about biopsies, rejection episodes, rejection treatments, and hospital admissions were obtained from the patient chart	Unlikely to have been blinded but not stated	No comparison data; adherence only measured in intervention group; Compliance in the intervention group was 97.8%	Drug compliance in the control group was not assessed because patients in this group did not use the EMD. Adherence 97.8% in the intervention group. No comparison data	Non significant postive intervention effects observed: Biopsy-verified rejection was three times more common among controls (13 patients vs 4; P = 0.054, not significant). Average P-creatinine level was slightly lower in the intervention group than the control group (131 vs 150 μmol/L, not significant), whereas mean tacrolimus was similar (7.32 vs 7.22 ng/mL, n.s.).	Number of missed doses varied significantly by weekday (p=0.033) - more likley to miss doses Sat and Thursday	Six of the 40 participants in the intervention group withdrew from the study prematurely, 3 of them due to “a feeling of being monitored.” A few days after the start of the study, 1 participant experienced the EMD to be extremely stressful/worrisome, which resulted in the withdrawal from the study. None of the participants in the control group withdrew from the study prematurely.
Reddy et al.	2016	Corporal Michael J. Crescenz VA Medical Center (CMCVAMC) in Philadelphia		Specialty Clinic	CAD	126	126 veterans with known CAD and poor adherence, aged 30-75	Adults, Older age	13 weeks	117/126	We included only patients between the ages of 30 and 75 with a diagnosis of coronary artery disease (CAD).We further limited this group to those who had documented poor adherence to a prescribed statin as measured by a 16-month medication possession ratio (MPR) of < 80 %. MPR is calculated using pharmacy refill data, as the proportion of days in the past 480 days that the patient has access to me…	None	GlowCap. The bottle has a computer chip in the lid that communicates with a cellularconnected plug-in nightlight. When all features are activated, the GlowCap monitor changes color 1 h before the scheduled time to take the medication. If the medication is taken during this period, the pill bottle does not sound an alarm. If the medication is not taken within the designated period, the bottle flas…		EMD	Both	Yes		The individual feedback participants received a bottle with a daily alarm and a weekly adherence feedback report. Weekly feedback reports displayed participants’ medication adherence and assigned a value for weekly performance based on the number of daysthat they had opened the bottle. Participants in the partner feedback also had a copy of the report sent to their designated family member, frien…	All patients received educational material on the importance of adherence to statin medication. The control group received this device, but none of the patient features were activated (no alarm or notification).	Adherence during 13 weeks, adherence during the 13-week post-intervention period, change in the PAM and MSPSS (all assessed from baseline to 13 weeks and from 14 weeks to 26 weeks), and change in the LDL-direct level (from baseline to 26 weeks).	Unlikely to have been blinded but not stated	20% ss; Significant change during intervention but declined back to baseline during follow-up	Control group 0.67(0.60-0.75); Individual feedback (0.89 (0.81,0.97); Feedback with partner (0.86(0.80,0.92))	The differences in mean reduction in LDL levels individual and partner feedback arms and the control group were not significant (p-values of 0.59 and 0.51, respectively).	We observed minimal score changes in the PAM and the MSPSS surveys during the intervention period and at 26 weeks. Point estimate changes between baseline and 26 weeks in PAM and MSPSS scores were not statistically significant and close to zero in magnitude	Not assessed
Sulaiman et al.	2016						NO RESULTS												Basing on information obtained directly from the INCA acoustic recording device, the group will discuss patterns of adherence and training on technique of inhaler use.	Generalised strategies to improve adherence, while technique errors will be corrected using checklists
Vasbinder et al.	2017	Outpatient clinics in Netehrlands		Specialty Clinic	Asthma	220	Children aged 4-11 years	4-11 years	1 year	213/219 (though analysed only 209/219)	Children aged 4–11 years who had doctor-diagnosed asthma for ⩾6 months and who had visited the outpatient clinic in the past 12 months. After verifying the other inclusion criteria, the use of ICS (fluticasone, fluticasone/salmeterol or beclometasone) delivered via a pMDI for ⩾3 months and having at least one parent/caregiver with a mobile phone, we contacted the parents and invited them to visit…	Excluded if parents did not respond to telephone calls after 3-4 times	RTMM device, which was connected to the pressurised metered-dose inhaler (pMDI) and recorded the time and date of administered ICS doses. Immediately after each actuation of the pMDI, data were sent to the study database through the mobile telephone network		EMD	Direct	Yes		The intervention group a received tailored SMS reminders, sent only when a dose was at risk of omission	No SMS reminders but still had RTMM device that recorded time and date of ICS dose	Adherence (timing adherence to ICS within a 6 hour time frame for planned inhalation); asthma control, freq of asthma exacerbations, asthma QoL, hospital admissions and ED visits, OCS bursts	No	Signficiant change (12% ss)	Over the full study period, adherence in the intervention group was 69.3% (95% CI 65.5–73.4%) and 57.3% (95% CI 52.8–61.7%) in the control group. The overall difference was statistically significant: 12.0% (95% CI 6.7–17.7%). The average estimated treatment effect over the first 6 months (15.0% (95% CI 9.3–20.7%)) was larger than in the second part of the year (9.0% (95% CI 2.4–16.3%)), but both …	No differences were found for asthma control, quality of life or asthma exacerbations. Costs were higher in the intervention group, but this difference was not statistically significant.	Total costs were higher in the intervention group, but the differences were not statistically significant: €731 versus €636 (difference €96, 95% CI €−55–271) from the healthcare perspective and €1043 versus €764 (difference €297 (95% CI €−13–437)) from a societal perspective	Not assessed
Gregoriano et al.	2016	In- and outpatients with a diagnosis of asthma bronchiale or COPD from several hospitals in the Basel region and patients treated by pulmonologists in private practice are screened for eligibility		Hospital, Specialty clinic	Asthma, COPD	154	154 aged over 18	Adults	6 months	Not completed	Aged 18 years or older Have an established asthma-diagnosis according to the Global Initiative for Asthma (GINA) guidelines and/or • Have an established COPD diagnosis according to the Global Initiative for Chronic Obstructive Lung Disease (GOLD) guidelines (severity GOLD I-IV based on the international GOLD-Criteria) [46] and • Are prescribed daily inhaled medication (controller medication for a…	Exclusion • Suffering from malignancies and/or other severe diseases • Insufficient in the German language • Pregnant or lactating	Smartinhaler and POEMS			Both	Yes		acoustic reminder for inhalation and receives support calls when the medication is not taken as prescribed; - The reminder was automatically set at the time, when the patients had to inhale their dose (every day) and not only when a dose was missed. - The support calls occurred only if the patients had not inhaled their medication as prescribed for more than 2 consecutive days. Recorded data with…	No reminder or other adhernece support	CAT, ACT, St. George’s Respiratory Questionnaire (SGRQ), and the Short Form (SF)-36, BMQ	No	Signficiant change - interim results (29% ss)	Interim results: Adherence to puff inhalers was higher in the intervention compared to control group (80 +/- 19 % vs. 51 +/- 21 %; p<0.001). No difference was found for powder capsules between intervention and control group (92 +/- 9 % vs. 88 +/- 14 %; p =0.239). More days with correct dosing were observed for powder capsules compared to puff inhalers (88 +/- 12 % vs. 66 +/- 27 %; p<0.001) and fo…	Not reported interim results	NB: Data only on first 54	Not assessed
Brath et al.	2013	Diabetes outpatient clinic		Specialty Clinic	Risk of cardiovascular conditions	150	150 patients with a defined risk for cardiovascular conditions (≤2 T2DM, Hypertension or hypercholesterolaemia)	Adults	52 weeks (4 week run in, 20 week control, 20 week intervention, 8 week run out)	53/77	defined risk for cardiovascular conditions (≤2 T2DM, Hypertension or hypercholesterolaemia)	Not listed	medication adherence management system (mAMS) - Electronic monitoring medication blister which connected with mobile phone app to send information about adherence to a web based telehealth system which was then used to remind patients automatically via text message		Electronic monitoring medication blister for intervention group and standard blister followed by pill count (at return of blisters after 4 weeks) for control group. Adherence measurement Medication adherence of the participating patients was based on 4 standard drugs for treating diabetes (metformin 1000 mg), hypercholesterolaemia (simvastatin 40 mg, rosuvastatin 10 mg) and hypertension (ramipril…	Direct	Yes		electronic blister pack transmit user information via mobile phone and atuomatically sent feedback back to user via text message. Participants with < 70% adherence were also called once a week to try and increase adherence	Given a standard medication blister and returned to study group after cotnrol phase completed	Primary: intake rate at 20 weeks. Secondary: comparison of laboratory data (fasting blood glucose concentration, HbA1c, blood cholesterol concentration) and blood pressure, measured during routinely scheduled checks at the beginning and at the end of the study.	Not stated	Only showed SS for metformin (unusual comparision method), p=0.04 but when compared individual groups = NS	Only showed SS for metformin (unusual comparision method), p=0.04 but when compared individual groups = NS	Significant improvement in BP and total cholesterol (compared beginning to end of study) (p<0.05)	N/a	Patients were satisfied with the ease, speed and reliability of use, reporting that the intervention affixed to the medication blister did not disturb them, and that overall the system was beneficial for the physician knowing if and when they are taking their medication.
Mehta et al.	2019	general internal medicine practices		University	Hypertension	151	151 Adults aged 18 to 75	Adults	4 months	126/151	diagnosis of hypertension, visit to the PCP at least twice in last 12 months and at least two out of range bp measurements, have a mobile phone and be on a bp medicine (define by JCN8)	dementia, severe cognitive impairment, end-stage renal disease, cirrhosis, or metastatic cancer.	Electronic pill bottle (arm 1) and bidirectional text messages (arm 2)		medication adherence (pill count for arm 1- proportion of days that the patient opened the pill bottle), respond to yes when asked in text message if took medicine (arm 2) NO MEASUREMENT IN CONTROL	Direct	Yes		Arm 1:electronic pill bottle (AdhereTech): electronically monitor openings and transmit them to online platform. Participants received one of two daily feedback messages, depending on their adherence the day prior. Arm 2: bidirectional texting arm received text messages via the online platform, prompting the participant to reply via text with his/her adherence for that day. Mirroring the pill bot…	usual care provided by clinical practice	Primary: change in bp from baseline. Secondary: medication adherence (pill count for arm 1, respond to yes when asked in text message if took medicine (arm 2)	Not stated	cf arm 1 with arm2 : 70.8 vs 77% (NS)	No correlation between adherence and bp in either arm	There was no significant change in systolic blood pressure between control and the pill bottle arm(p = 0.94) or the text messaging arm (p = 1.00), and the two intervention arms did not differ from each other (p=0.93).	N/a	Participants in the pill bottle and text messaging arms were also asked “Please rate how likely you would be to recommend the Way2Text Program to others who are prescribe blood pressure medication on a scale from 0-10? (0 = Not At All Likely, 10 = Extremely Likely).”Among the 98 out of 117 participants in the pill bottle and text messaging arms who completed the follow up survey, there was a mean…
Morton et al.	2017	hospital clinic		hospital	asthma	90	90 children aged 6 - 16 years	Children	12 months	79/90	taking regular inhaled steroids, with no change in their medication in the last month and an Asthma Control Questionnaire (ACQ) score of at least 1.5, indicating they had poorly controlled asthma	could not speak English or had another "significant" chronic condition	Smartinhalers’ and ‘Smartturbos’		EMD attached to inhaler	Both	Yes		Smartinhalers’ and ‘Smartturbos’ that delivered reminders when forgotten and was upload to clinician and discussed at 3 month check up	Same smart inhaler but no alarms and no review by clinician	Primary: Change in ACQ value from baseline at 3, 6, 9 and 12 months	FEV1%,2number of unplanned attendances to general practitioner /emergency department for asthma since last visit (as reported by parents), number of courses of oral steroids required, number of days off school due to asthma, use of β-agonists in the past week and BTS level of asthma therapy	70% (intervention) vs 49% (control)12 months (p<0.001)	adherence maintained at 12 months in intervention group - declined in control	Children in the intervention group required significantly fewer courses of oral steroids ( p=0.008) and fewer hospital admissions (p≤0.001). No difference in ACQ changes, FEV% or any other outcome	N/a	Overall higher rates of broken, damaged and lost devices in the intervention group: 50% of devices were broken by the child in the intervention group vs 19% in the control; 37% were damaged beyond repair (intervention group) vs 5% in the control; 22% forgot their devices in the intervention group vs 43% in the control; and 11% lost the device completely in the intervention group vs 5% in the cont…
Sulaiman et al.	2018	hospital clinic		University	asthma	218	218 adults with stage 3 -5 asthma	Adults	3 months	148/218	Uncontrolled asthma = patients already attending the specialist clinic and using a prescribed therapy equivalent to step 3 or higher on the Asthma Management Guidelines for more than 3 months, and who had at least one exacerbation that was treated with systemic glucocorticoids in the prior year, and whose condition was not controlled as per the GINA definition of uncontrolled asthma	prior hypersensitivity to salmeterol/fluticasone	INhaler Compliance Assessment (INCA) attached to inhaler to make a digital audio recording each time the inhaler is used		EMD attached to inhaler	Indirect (discussion at 4, 8 and 12 weeks with nurse)	No		Control plus biofeedback-guided training	Repeated training in inhaler use, adherence and disease management, no biofeedback	Primary: rate of actual inhaler adherence. Other: PEF, asthma control (Asthma Control Test (ACT) and Asthma Quality of Life Questionnaire (AQLQ)	not clear - but unlikely	73% (intervention) vs 63% (control), p<0.01	Intervention also improved over time (1 month to 3 months) whereas control did not	There was no difference in clinical allocation between the (bio)feedback and demonstration groups.	Of these 146 participants, 54 were controlled and 92 patients still had some persisting issue related to asthma control. Among these, 52 (35%) were uncontrolled and had an actual adherence rate <80% (mean 51.8%), and could therefore be considered “difficult to manage”, requiring more attention on adherence. 40 patients (27%) were uncontrolled with an adherence >80%.	Not assessed
Yeh et al.	2017	hospital clinic			multiple sclerosis	71	71 children with MS	Children (10-18)	6 months	49/71	MS with exposureto MS disease modifying treatments for ≥6 months	use of IV DMT (e.g., natalizumab) or being non-English speaking	MEMS + behavioural feedback		MEMS, Rx refills, Morisky 8 item, Multiple Sclerosis Treatment Adherence Questionnaire	Indirect	No		Subjects received a supplemental device which downloaded Adherence data from the MEMS cap for use by the behavioral interventionist during a telephone feedback session at 1,2 and 3 months post-enrolent. Phone called based on MI based on adherence (parents not involved)	video related to DMT in pediatric MS sent at 1, 2 and 3 months	Primary= adherence (all different measures, as missing 20% of doses, either from pharmacy refill or from parent-reported data). Secondary= QoL and psychosocial measures	not clear - but unlikely	Intervention had worse adherence than control using MEMS at 3 months Cohen's d (-0.34) and 6 months (-0.7)	Intervention had worse adherence than control using MEMS at 3 and 6 months but better prescription refills and better MAQ scores	Not assessed	Better MSSE functioning and control in intervention group, and better PedsQL I nphysical, emotional and social domains but worse wellbeig and environmental mastery	Not assessed
Gregarino et al.	2019	In- and outpatients with a diagnosis of asthma bronchiale or COPD from several hospitals in the Basel region and patients treated by pulmonologists in private practice are screened for eligibility		Hospital, Specialty clinic	Asthma, COPD	169	169	Adults	6 months	149/169	Aged 18 years or older Have an established asthma-diagnosis according to the Global Initiative for Asthma (GINA) guidelines and/or • Have an established COPD diagnosis according to the Global Initiative for Chronic Obstructive Lung Disease (GOLD) guidelines (severity GOLD I-IV based on the international GOLD-Criteria) [46] and • Are prescribed daily inhaled medication (controller medication for a…	Exclusion • Suffering from malignancies and/or other severe diseases • Insufficient in the German language • Pregnant or lactating	Smartinhaler and POEMS		Smartinhaler and POEMS	Both	Yes (after 2 days of no dose)		acoustic reminder for inhalation and receives support calls when the medication is not taken as prescribed; - The reminder was automatically set at the time, when the patients had to inhale their dose (every day) and not only when a dose was missed. - The support calls occurred only if the patients had not inhaled their medication as prescribed for more than 2 consecutive days. Recorded data with…	Participants assigned to the control group did neither receive any reminder nor additional assistance or feedback regarding their medication adherence behaviour.	Primary: time to next asthma or COPD exacerbation. Others: Frequency of exacerbation (defined as the number of exacerbations during the study period), the number of severe exacerbations which led to a hospitalisation, timing- and taking-adherence and health-related quality of life (QoL).	No	+	mean (SD) days in target range 81.6 (14.2)intervention vs 60.1 (30.3)control p=<.001 for puff inhalers and 89.6 (9.8)intervention 80.2 (21.3) control, p= .01 for dry powder	Longer average time to the next exacerbation was observed in the intervention compared to the control group (102 days [95% CI, 76 to 128] vs. 86 days [95% CI, 66 to 106],P = 0.19). Intervention had no effect on time to first exacerbation (HR 0.65, 95% CI 0.21 to 2.07, P = .24), but showed a trend toward a 39% decreased frequency of exacerbations (RR = 0.61, 95% CI 0.35 to 1.03, P = .070). No sign…	N/a	Not assessed
						6194
